# Supplementary material for: Premature mitotic entry induced by ATR inhibition potentiates olaparib inhibition‐mediated genomic instability, inflammatory signaling, and cytotoxicity in BRCA2‐deficient cancer cells
Source: PubMed Central journal article supplement (PMC6822251; doi:10.1002/1878-0261.12573), 2019-10-21

# Supplemental Figure S5

**A**

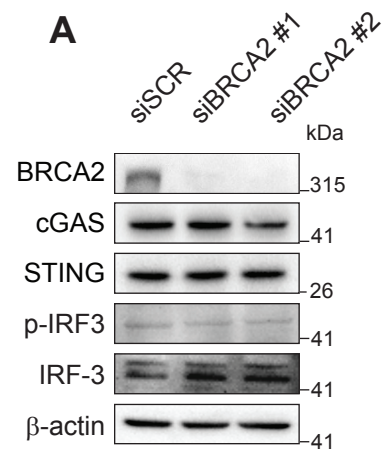

**B**

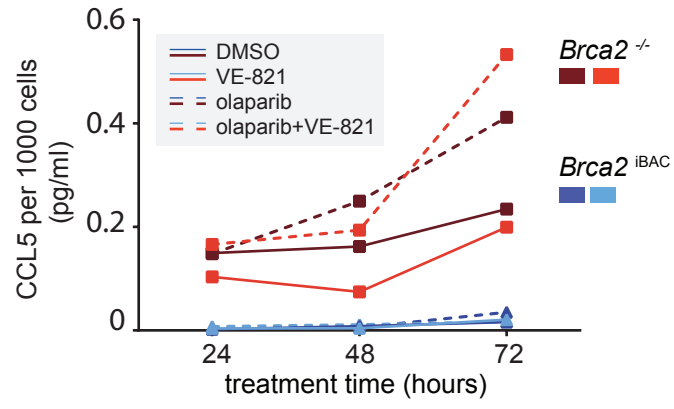

Supplement: MOL2-13-2422-s005.pdf [file MOL2-13-2422-s005.pdf]
